# Supplementary material for: Using an Uncertainty Quantification Framework to Calibrate the Runoff Generation Scheme in E3SM Land Model V1
Source: Copernicus journal article supplement (doi:10.5194/gmd-2021-401), 2021-12-16
Supplement: Supplementary file 1 [file gmd-2021-401-supplement.pdf]

Supplementary materials for

# Using an Uncertainty Quantification Framework to Calibrate the Runoff Generation Scheme in E3SM Land Model V1

Donghui Xu<sup>1</sup>, Gautam Bisht<sup>1</sup>, Khachik Sargsyan<sup>2</sup>, Chang Liao<sup>1</sup>, L. Ruby Leung<sup>1</sup>

<sup>1</sup>Atmospheric Sciences and Global Change Division, Pacific Northwest National Laboratory, Richland, WA, USA

<sup>2</sup>Sandia National Laboratories, Livermore, CA, United States

*Correspondence to:* Donghui Xu ([donghui.xu@pnnl.gov](mailto:donghui.xu@pnnl.gov))

## **Contents of this file**

Figure S1 to S10

Table S1

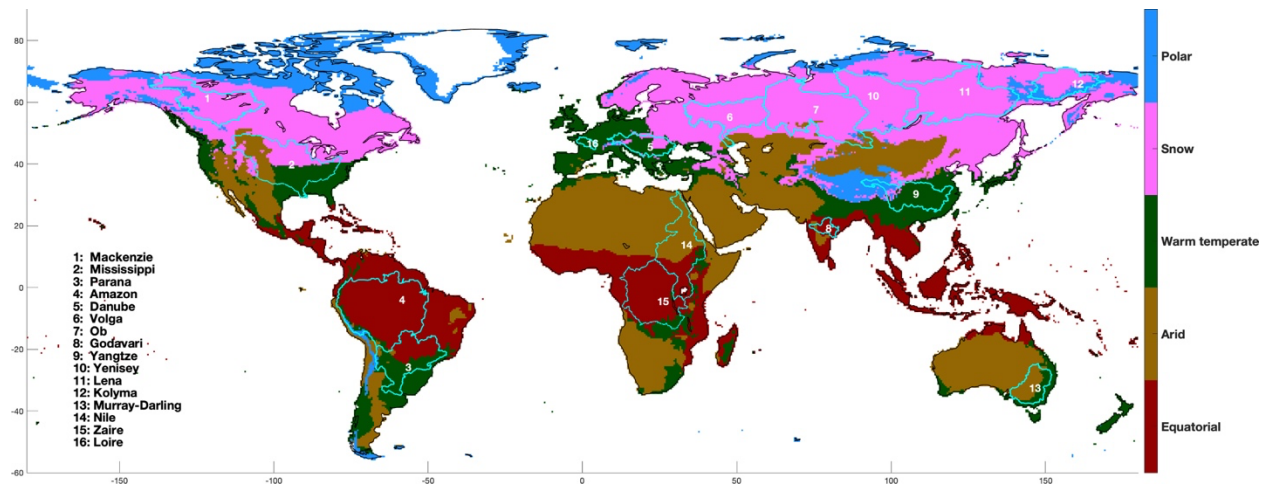

**Figure S1.** Köppen climate classification with selected major basin boundaries.

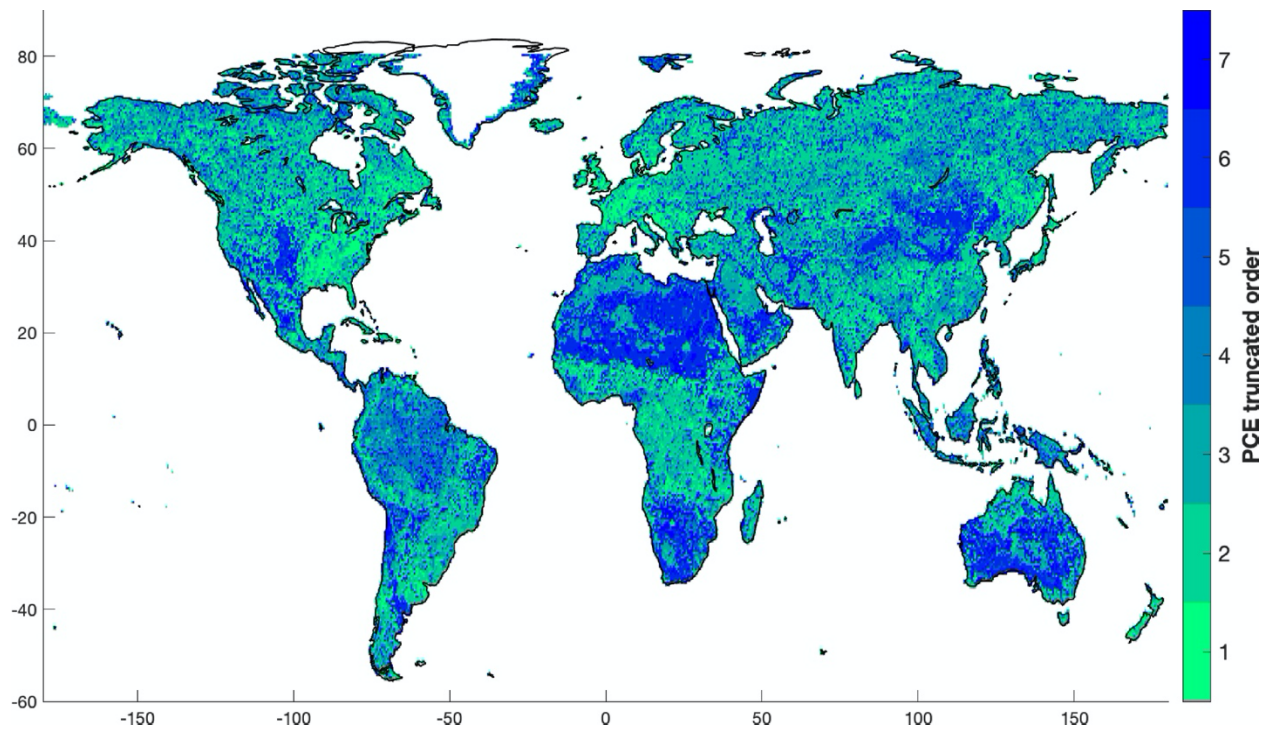

**Figure S2.** Truncated order of the constructed PCE with best performance.

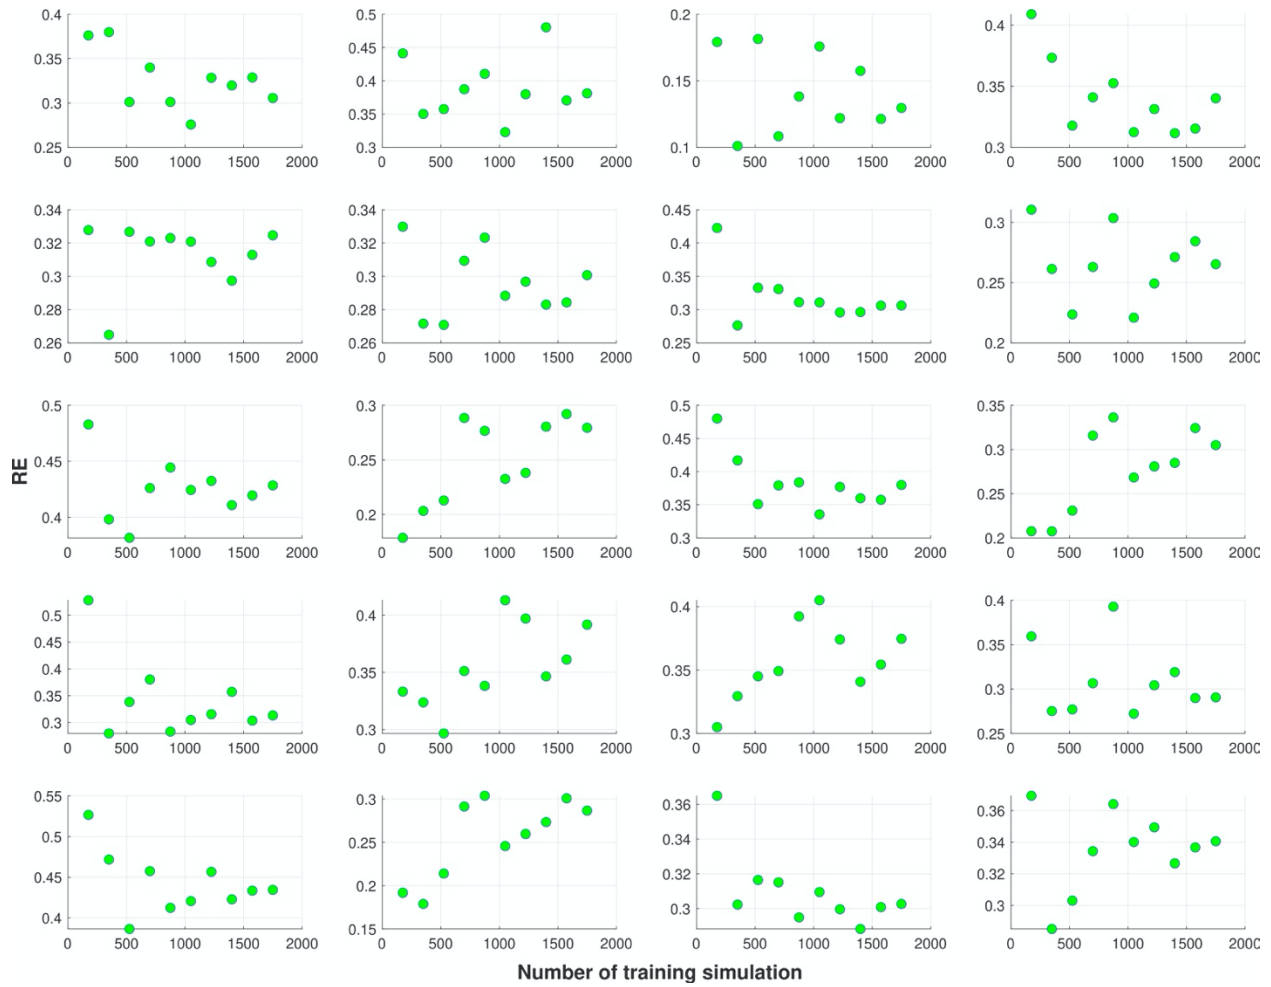

**Figure S3.** Test the performance of PCE-based surrogate models with different number of training simulation with 20 example grid cells from arid regions.

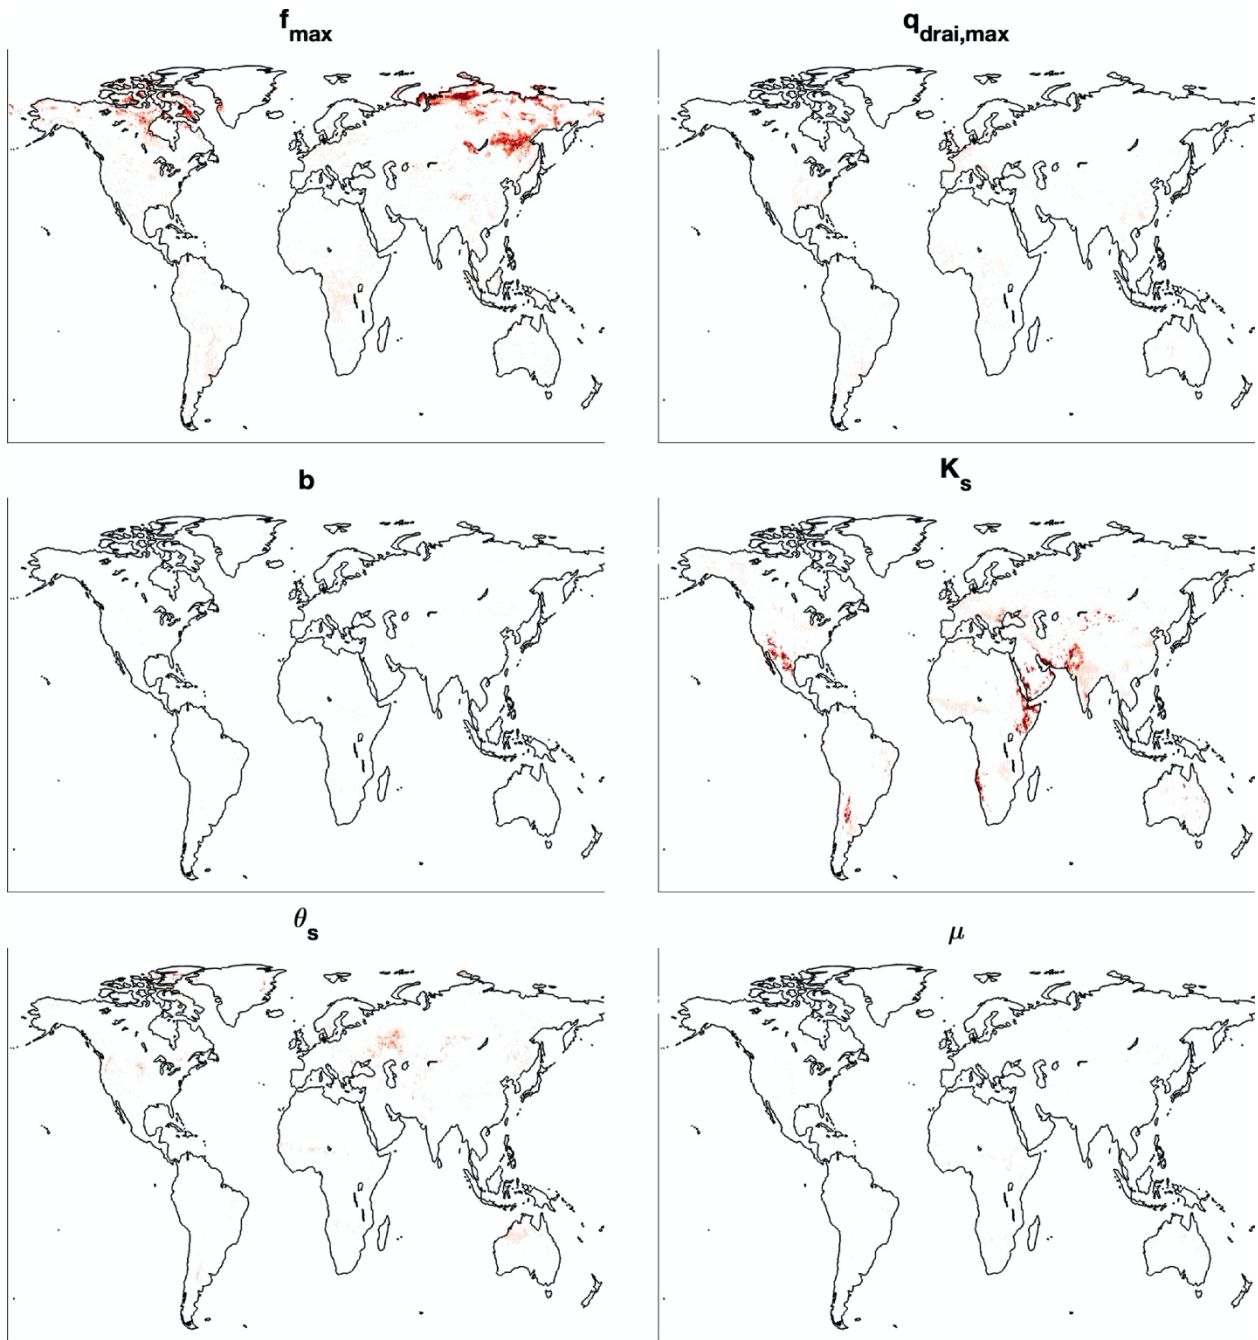

**Figure S4.** Spatial distribution of main Sobol index for the less sensitive parameters.

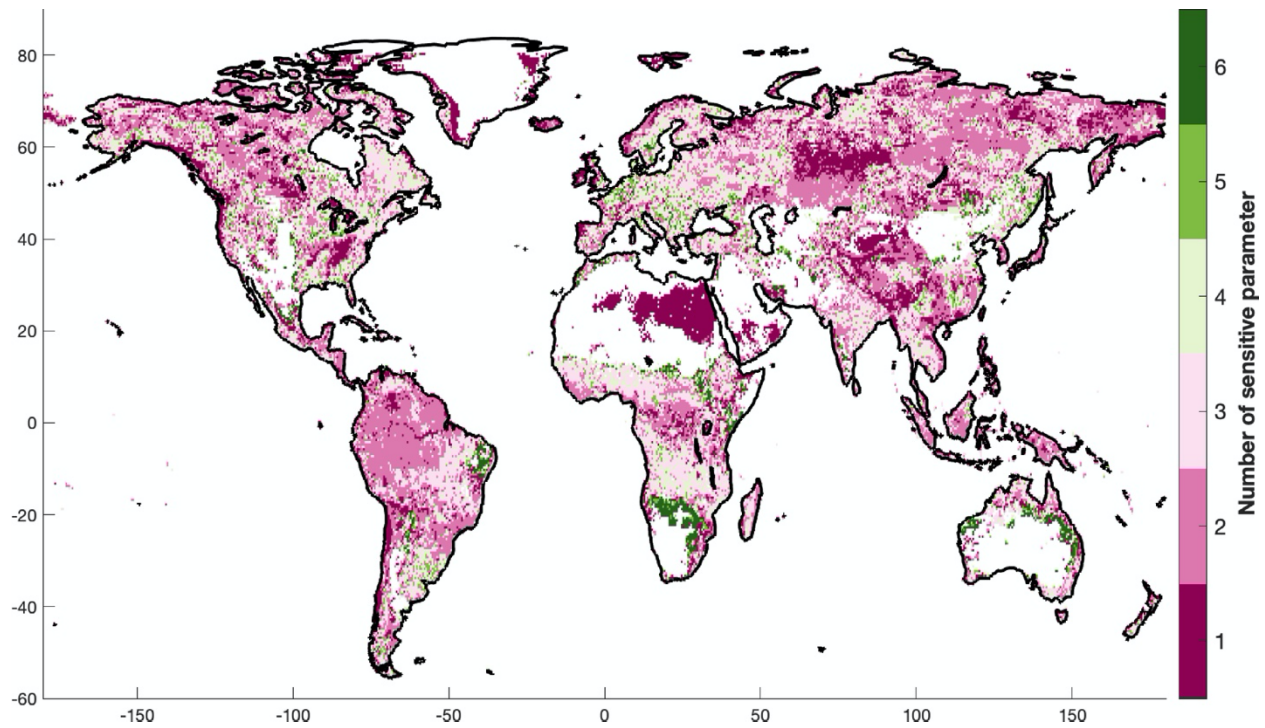

**Figure S5.** Number of significant parameters for runoff generation. A parameter is regarded as significant if its main Sobol index is larger than 0.05. The cells with relative errors of surrogate models higher than 0.15 are excluded here.

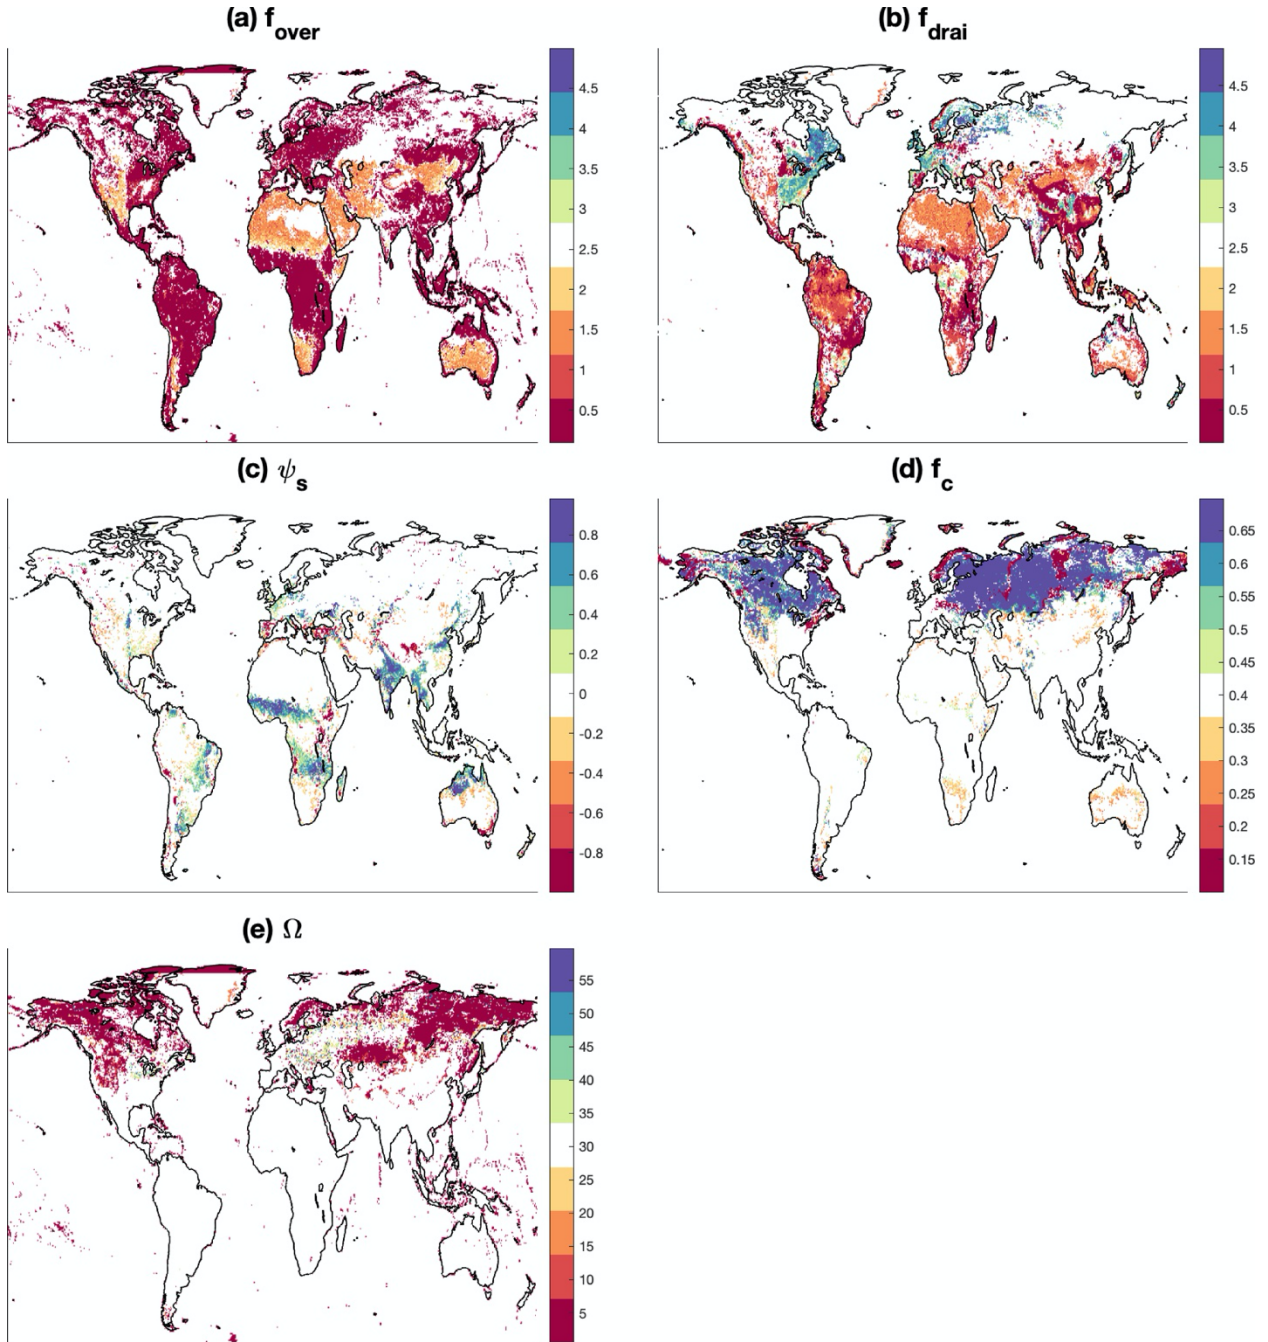

**Figure S6.** Parameter values at 5% of the posterior. There are no certainty bounds for  $\psi_s$  from different grid cells because it is determined by the soil properties. Therefore, the values of  $\psi_s$  are scaled to [-1, 1] in subplot (c) for each grid cell with the corresponding upper bound

$$(\psi_{s,max}) \text{ and lower bound } (\psi_{s,min}): \frac{2}{\psi_{s,max} - \psi_{s,min}} \psi_s - \frac{\psi_{s,max} + \psi_{s,min}}{\psi_{s,max} - \psi_{s,min}}.$$

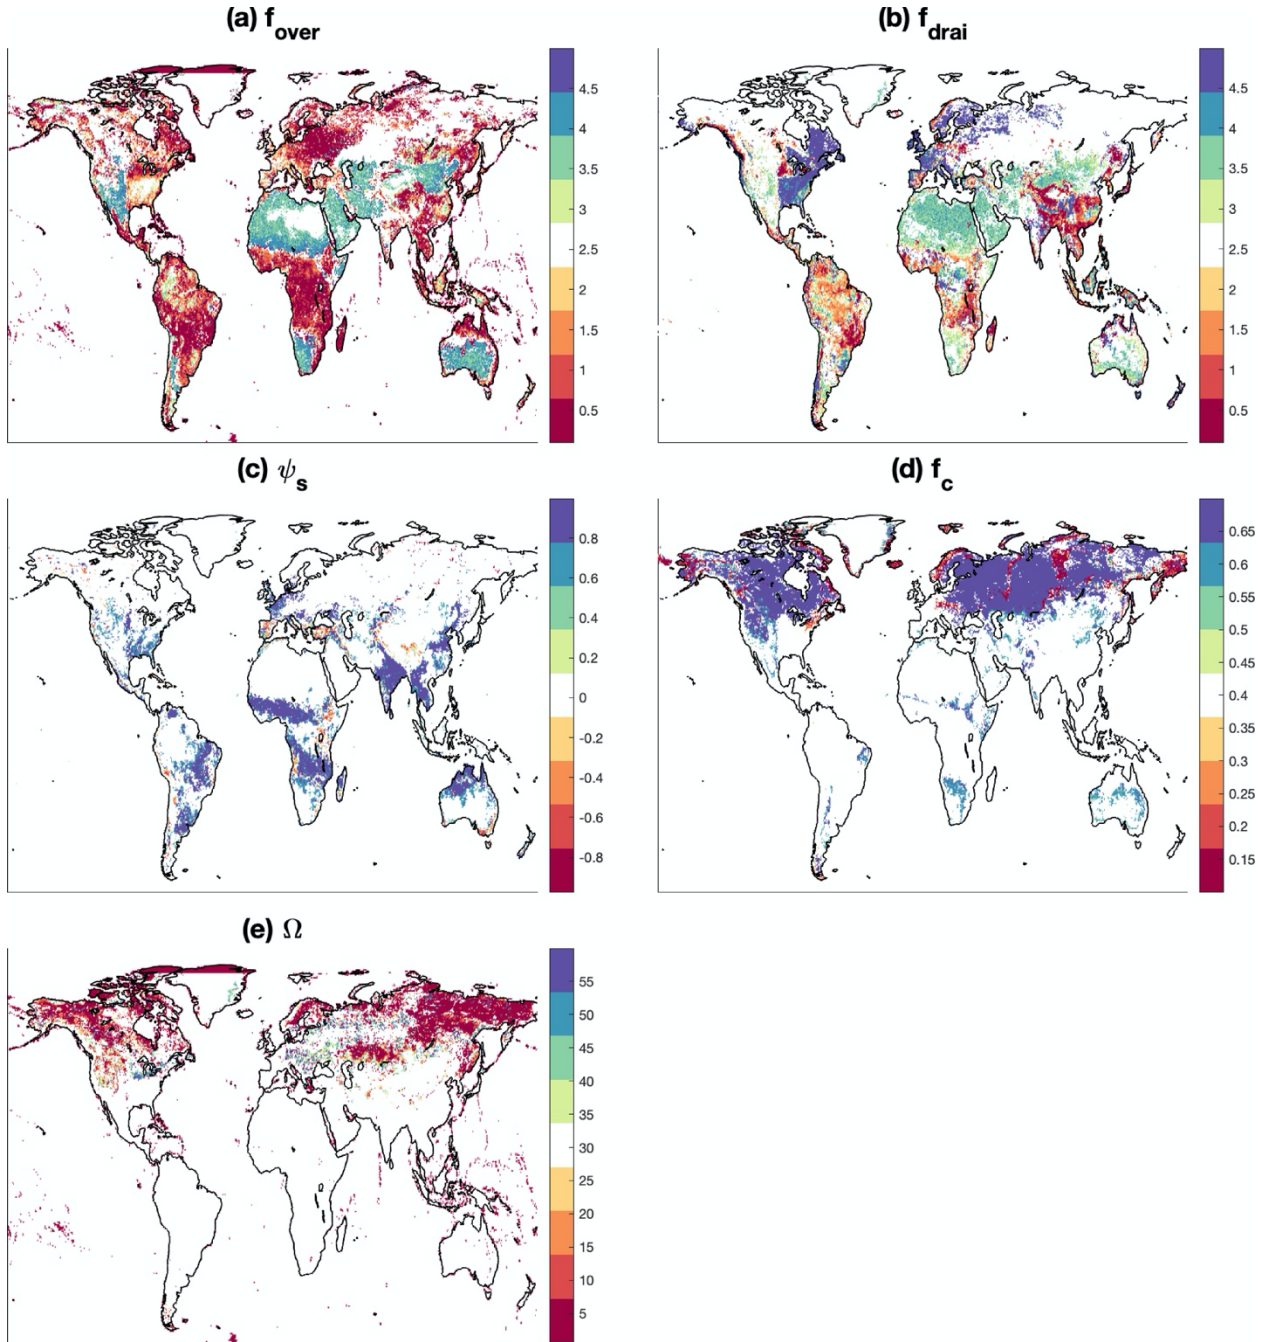

**Figure S7.** Parameter values at 95% of the posterior. There are no certainty bounds for  $\psi_s$  from different grid cells because it is determined by the soil properties. Therefore, the values of  $\psi_s$  are scaled to [-1, 1] in subplot (c) for each grid cell with the corresponding upper bound

$$(\psi_{s,max}) \text{ and lower bound } (\psi_{s,min}): \frac{2}{\psi_{s,max}-\psi_{s,min}} \psi_s - \frac{\psi_{s,max}+\psi_{s,min}}{\psi_{s,max}-\psi_{s,min}}.$$

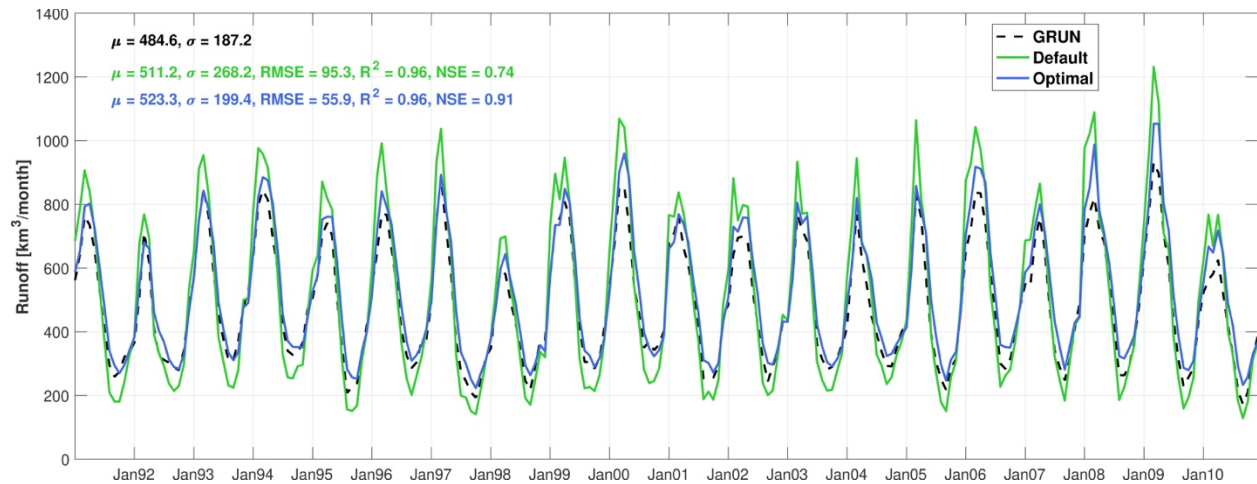

**Figure S8.** Monthly time series of reference runoff and simulated runoff for Amazon basin.  $\mu$  is the mean, and  $\sigma$  is the standard deviation.

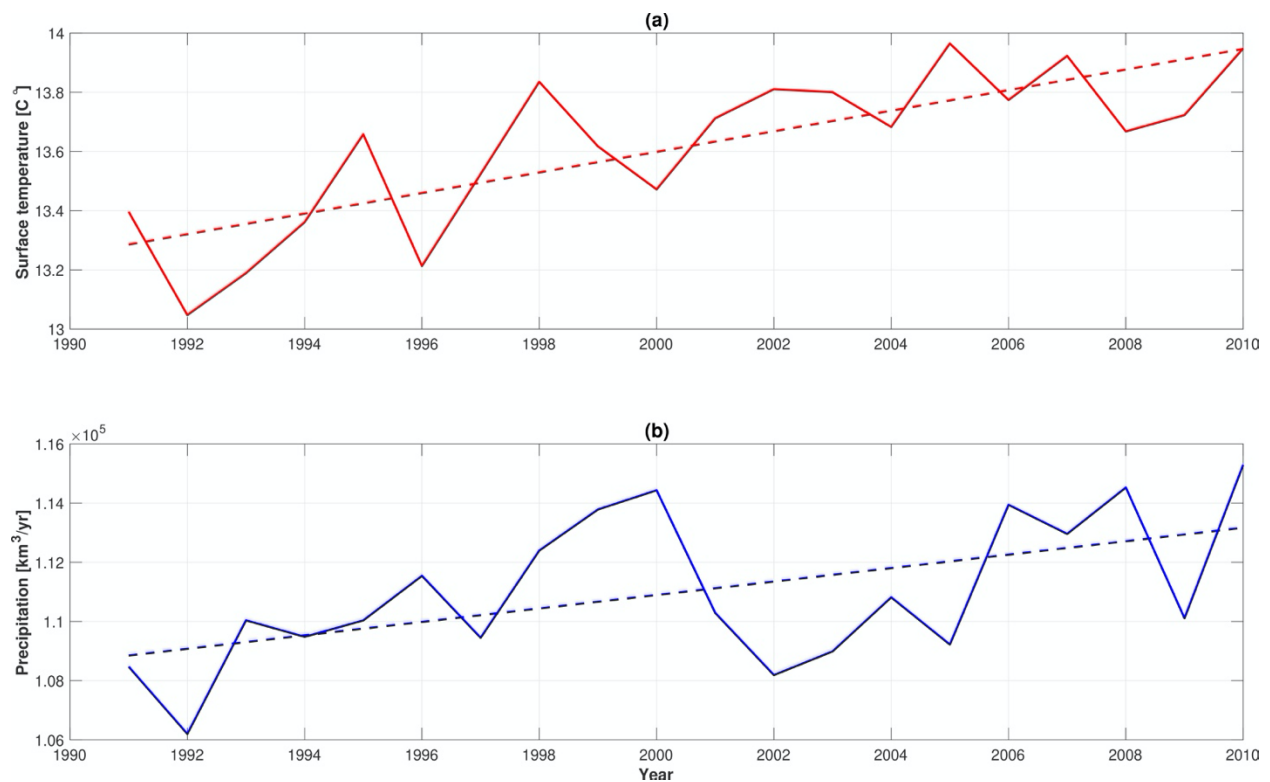

**Figure S9.** Global annual (a). temperature, and (b). precipitation trend for the simulation period using GSWP3v1 data. The blue and red dashed lines represent the linear trend.



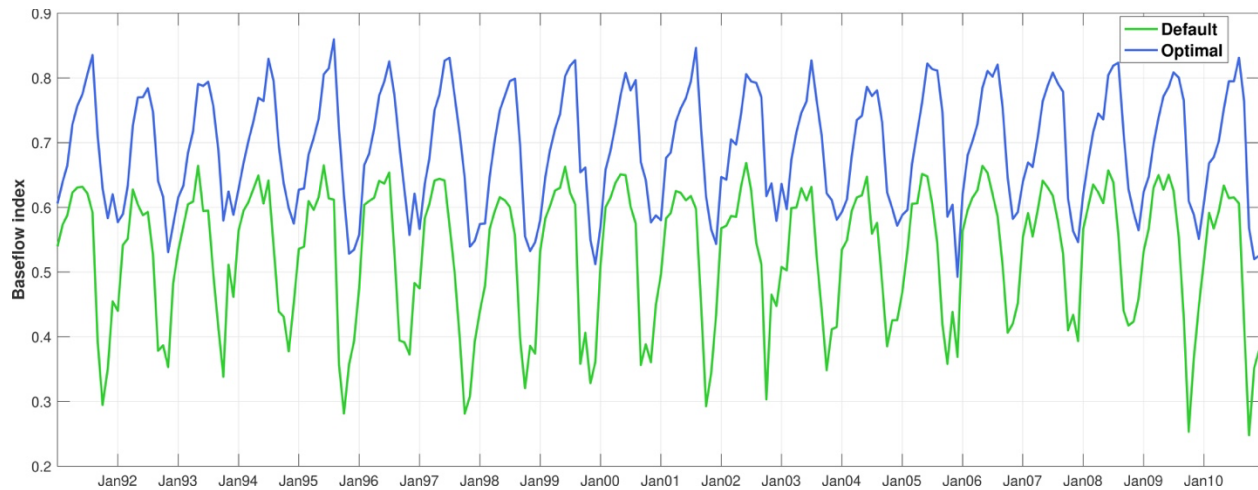

**Figure S10.** Monthly time series of baseflow index (i.e., ratio between subsurface runoff and total runoff) for Amazon basin.

**Table S1.** Model relative error at basin scale with default and optimal parameters.

| Basin       | Relative error |         |
|-------------|----------------|---------|
|             | Default        | Optimal |
| Mackenzie   | -40.5%         | -31.4%  |
| Mississippi | 18.1%          | 17.2%   |
| Parana      | 1.5%           | 10.1%   |
| Amazon      | 5.5%           | 9.6%    |
| Danube      | 6.0%           | 7.4%    |
| Volga       | 48.9%          | 65.8%   |
| Ob          | 21.9%          | 30.2%   |
| Godavari    | 44.6%          | 26.6%   |
| Yangtze     | 61.1%          | 66.6%   |
| Yenisey     | 25.3%          | 33.5%   |
| Lena        | 3.3%           | 13.5%   |
| Kolyma      | -13.1%         | -3.8%   |
| Murray      | -24.9%         | -15.1%  |
| Nile        | -41.1%         | -20.0%  |
| Congo       | -14.9%         | -5.9%   |
| Loire       | 11.4%          | 4.0%    |
